# Supplementary material
Source: Springer Nature journal article supplement (https://www.springermedizin.de/resource/supplementary/13643_2012_94_MOESM4_ESM.pdf/9681474)
Supplement: MOESM4 [file 9681474]

#### Additional file 4 - List of excluded reviews

| Number | Citation                                                                                                                                                                                                                                                    |
|--------|-------------------------------------------------------------------------------------------------------------------------------------------------------------------------------------------------------------------------------------------------------------|
| 1      | Albano MG, Crozet C, D'Ivernois JF. Analysis of the 2004-2007 literature on therapeutic patient education in diabetes: Results and trends. <i>Acta Diabetol</i> 2008; 45(4): 211-219.                                                                       |
| 2      | Armour TA, Norris SL, Jack J, Zhang X, Fisher L. The effectiveness of family interventions in people with diabetes mellitus: A systematic review. <i>Diabet Med</i> 2005; 22(10): 1295-1305.                                                                |
| 3      | Azar M, Gabbay R. Web-based management of diabetes through glucose uploads: has the time come for telemedicine? <i>Diabetes Res Clin Pract</i> 2009; 83(1): 9-17.                                                                                           |
| 4      | Balas EA, Boren SA, Griffing G. Computerized management of diabetes: a synthesis of controlled trials. <i>Proc AMIA Symp.</i> 1998: 295-299                                                                                                                 |
| 5      | Baradaran HR, Shams-Hosseini N, Noori-Hekmat S, Tehrani-Banihashemi A, Khamseh ME. Effectiveness of diabetes educational interventions in Iran: a systematic review. <i>Diabetes Technol Ther</i> 2010; 12(4): 317-331.                                     |
| 6      | Bazian Ltd. Education to prevent foot ulcers in diabetes. <i>Evid Base Healthc Publ Health</i> 2005; 9(5): 351-358.                                                                                                                                         |
| 7      | Blenkinsopp A, Hassey A. Effectiveness and acceptability of community pharmacy-based interventions in type 2 diabetes: A critical review of intervention design, pharmacist and patient perspectives. <i>Int J Pharm Pract</i> 2005; 13(4): 231-240.        |
| 8      | Boren SA, Fitzner KA, Panhalkar PS, Specker JE. Costs and benefits associated with diabetes education: a review of the literature. <i>Diabetes Educ</i> 2009; 35(1): 72-96.                                                                                 |
| 9      | Boren SA, Gunlock TL, Peeples MM, Krishna S. Computerized learning technologies for diabetes: a systematic review. <i>J Diabetes Sci Technol</i> 2008; 2(1): 139-146.                                                                                       |
| 10     | Boren SA, Puchbauer AM, Williams F. Computerized prompting and feedback of diabetes care: a review of the literature. <i>J Diabetes Sci Technol</i> 2009; 3(4): 944-950.                                                                                    |
| 11     | Boren SA. A review of health literacy and diabetes: opportunities for technology. <i>J Diabetes Sci Technol</i> 2009; 3(1): 202-209.                                                                                                                        |
| 12     | Conn VS, Hafdahl AR, Mehr DR, Lemaster JW, Brown SA, Nielsen PJ. Metabolic effects of interventions to increase exercise in adults with type 2 diabetes. <i>Diabetologia</i> 2007; 50(5): 913-921.                                                          |
| 13     | DeCoster VA, Cummings SM. Helping adults with diabetes: a review of evidence-based interventions. <i>Health Soc Work</i> 2005; 30(3): 259-264.                                                                                                              |
| 14     | DeCoster VA. Diabetes treatments. <i>J Gerontol Soc Work</i> 2008; 50(1): 105-129.                                                                                                                                                                          |
| 15     | Eakin EG, Bull SS, Glasgow RE, Mason M. Reaching those most in need: a review of diabetes self-management interventions in disadvantaged populations. <i>Diabetes Metab Res Rev</i> 2002; 18(1): 26-35.                                                     |
| 16     | Eastridge DK. An integrative review of interventions to reduce peripheral arterial disease risk factors in African Americans. <i>J Vasc Nurs</i> 2009; 27(2): 31-45.                                                                                        |
| 17     | Eslami S, Abu-Hanna A, de Jonge E, de Keizer NF. Tight glycemic control and computerized decision-support systems: a systematic review. <i>Intensive Care Med</i> 2009; 35(9): 1505-1517.                                                                   |
| 18     | Faas A, Schellevis FG, Van Eijk JT. The efficacy of self-monitoring of blood glucose in NIDDM subjects. A criteria-based literature review. <i>Diabetes Care</i> 1997; 20(9): 1482-1486.                                                                    |
| 19     | Fan L, Sidani S. Effectiveness of diabetes self-management education intervention elements: A meta-analysis. <i>Can J Diabetes</i> 2009; 33(1): 18-26.                                                                                                      |
| 20     | Gialamas A, St JA, Laurence CO, Bubner TK, PoCT Management Committee. Point-of-care testing for patients with diabetes, hyperlipidaemia or coagulation disorders in the general practice setting: a systematic review. <i>Fam Pract</i> 2010; 27(1): 17-24. |

|    |                                                                                                                                                                                                                                                                                                                      |
|----|----------------------------------------------------------------------------------------------------------------------------------------------------------------------------------------------------------------------------------------------------------------------------------------------------------------------|
| 21 | Graziano JA, Gross CR. The effects of isolated telephone interventions on glycemic control in type 2 diabetes: a literature review. <i>Adv Nurs Sci</i> 2009; 32(3): E28-E41.                                                                                                                                        |
| 22 | Greenhalgh PM. Shared care for diabetes. A systematic review. <i>Occas Pap R Coll Gen Pract</i> 1994; 67: i-viii, 1-35.                                                                                                                                                                                              |
| 23 | Guldberg TL, Lauritzen T, Kristensen JK, Vedsted P. The effect of feedback to general practitioners on quality of care for people with type 2 diabetes. A systematic review of the literature. <i>BMC Fam Pract</i> 2009; 10: 30.                                                                                    |
| 24 | Harris M, Smith B, Veale A. Printed patient education interventions to facilitate shared management of chronic disease: A literature review. <i>Intern Med J</i> 2005; 35(12): 711-716.                                                                                                                              |
| 25 | Harris SB, Petrella RJ, Leadbetter W. Lifestyle interventions for type 2 diabetes. Relevance for clinical practice. <i>Can Fam Physician</i> 2003; 49(Dec): 1618-1625.                                                                                                                                               |
| 26 | Hatherly K, Overland J, Smith L, Taylor S, Johnston C. Providing optimal service delivery for children and adolescents with type 1 diabetes: A systematic review. <i>Pract Diabetes Int</i> 2009; 26(4):154-159.<br>Link: DO - <a href="http://dx.doi.org/10.1002/pdi.1360">http://dx.doi.org/10.1002/pdi.1360</a> . |
| 27 | Hill-Briggs F, Gemmell L. Problem solving in diabetes self-management and control: a systematic review of the literature. <i>Diabetes Educ</i> 2007; 33(6): 1032-1050.                                                                                                                                               |
| 28 | Jaana M, Pare G. Home telemonitoring of patients with diabetes: a systematic assessment of observed effects. <i>J Eval Clin Pract</i> 2007; 13(2): 242-53.                                                                                                                                                           |
| 29 | Jack J. Diabetes self-management education research: An international review of intervention methods, theories, community partnerships and outcomes. <i>Dis Manag Health Out</i> 2003; 11(7): 415-428.                                                                                                               |
| 30 | Jackson CL, Bolen S, Brancati FL, Batts-Turner ML, Gary TL. A systematic review of interactive computer-assisted technology in diabetes care. Interactive information technology in diabetes care. <i>J Gen Intern Med</i> 2006; 21(2): 105-110.                                                                     |
| 31 | Jackson L. Translating the Diabetes Prevention Program into practice: a review of community interventions. <i>Diabetes Educ</i> 2009; 35(2): 309-320.                                                                                                                                                                |
| 32 | Khunti K, Camosso-Stefinovic J, Carey M, Davies MJ, Stone MA. Educational interventions for migrant South Asians with Type 2 diabetes: A systematic review. <i>Diabet Med</i> 2008; 25(8): 985-992.                                                                                                                  |
| 33 | Knight K, Badamgarav E, Henning JM, Hasselblad V, Gano AD, Jr., Ofman JJ, et al. A systematic review of diabetes disease management programs. <i>Am J Manag Care</i> 2005; 11(4): 242-250.                                                                                                                           |
| 34 | Krishna S, Boren SA. Diabetes Self-Management Care via Cell Phone: A Systematic Review. <i>J Diabetes Sci Technol</i> 2008; 2(3): 509-517.                                                                                                                                                                           |
| 35 | Lacey KO, Chyun DA, Grey M. An integrative literature review of cardiac risk factor management in diabetes education interventions. <i>Diabetes Educ</i> 2000; 26(5): 812-820.                                                                                                                                       |
| 36 | Leykum LK, Pugh J, Lawrence V, Parchman M, Noel PH, Cornell J, et al. Organizational interventions employing principles of complexity science have improved outcomes for patients with Type II diabetes. <i>Implement Sci</i> 2007; 2(28): doi:10.1186/1748-5908-2-28.                                               |
| 37 | Mason J, O'Keeffe C, McIntosh A, Hutchinson A, Booth A, Young RJ. A systematic review of foot ulcer in patients with type 2 diabetes mellitus. I: prevention. <i>Diabet Med</i> 1999; 16(10): 801-812.                                                                                                               |
| 38 | Mc Manus V, Savage E. Cultural perspectives of interventions for managing diabetes and asthma in children and adolescents from ethnic minority groups. <i>Child Care Health Dev</i> 2010; 36(5): 612-622.                                                                                                            |
| 39 | McAndrew L, Schneider SH, Burns E, Leventhal H. Does patient blood glucose monitoring improve diabetes control? A systematic review of the literature. <i>Diabetes Educ</i> 2007; 33(6): 991-1011.                                                                                                                   |
| 40 | McBroom LA, Enriquez M. Review of family-centered interventions to enhance the health                                                                                                                                                                                                                                |

|    |                                                                                                                                                                                                                                                                                                                                      |
|----|--------------------------------------------------------------------------------------------------------------------------------------------------------------------------------------------------------------------------------------------------------------------------------------------------------------------------------------|
|    | outcomes of children with type 1 diabetes. <i>Diabetes Educ</i> 2009; 35(3): 428-438.                                                                                                                                                                                                                                                |
| 41 | Montani S, Bellazzi R, Quaglini S, d'Annunzio G. Meta-analysis of the effect of the use of computer-based systems on the metabolic control of patients with diabetes mellitus. <i>Diabetes Technol Ther</i> 2001; 3(3): 347-356.                                                                                                     |
| 42 | Munro N, Felton A, McIntosh C. Is multidisciplinary learning effective among those caring for people with diabetes? <i>Diabet Med</i> 2002; 19(10): 799-803.                                                                                                                                                                         |
| 43 | Murphy HR, Rayman G, Skinner TC. Psycho-educational interventions for children and young people with Type 1 diabetes. <i>Diabet Med</i> 2006; 23(9): 935-943.                                                                                                                                                                        |
| 44 | Naik AD, Issac TT, Street J, Kunik ME. Understanding the quality chasm for hypertension control in diabetes: A structured review of "co-manuevers" used in clinical trials. <i>J Am Board Fam Med</i> 2007; 20(5): 469-478.                                                                                                          |
| 45 | Nakhla M, Daneman D, Frank M, Guttmann A. Translating transition: a critical review of the diabetes literature. <i>J Pediatr Endocrinol Metab</i> 2008; 21(6): 507-516.                                                                                                                                                              |
| 46 | Newman S, Steed L, Mulligan K. Self-management interventions for chronic illness. <i>Lancet</i> 2004; 364(9444): 1523-1537.                                                                                                                                                                                                          |
| 47 | Nichols PJ, Norris SL. A systematic literature review of the effectiveness of diabetes education of school personnel. <i>Diabetes Educ</i> 2002; 28(3): 405-414.                                                                                                                                                                     |
| 48 | Norris SL, Lau J, Smith SJ, Schmid CH, Engelgau MM. Self-management education for adults with type 2 diabetes: a meta-analysis of the effect on glycemic control. <i>Diabetes Care</i> 2002; 25(7): 1159-71.                                                                                                                         |
| 49 | Norris SL, Nichols PJ, Caspersen CJ, Glasgow RE, Engelgau MM, Jack L, et al. The effectiveness of disease and case management for people with diabetes. A systematic review. <i>Am J Prev Med</i> 2002; 22(4 Suppl): 15-38.                                                                                                          |
| 50 | O'Brien T, Denham SA. Diabetes care and education in rural regions. <i>Diabetes Educ</i> 2008; 34(2): 334-347.                                                                                                                                                                                                                       |
| 51 | O'Mullane M, McHugh S, Bradley CP. Informing the development of a national diabetes register in Ireland: a literature review of the impact of patient registration on diabetes care. <i>Inform Prim Care</i> 2010; 18(3): 157-168.                                                                                                   |
| 52 | Osborn CY, Mayberry LS, Mulvaney SA, Hess R. Patient web portals to improve diabetes outcomes: a systematic review. <i>Curr Diab Rep</i> 2010; 10(6): 422-435.                                                                                                                                                                       |
| 53 | Padgett D, Mumford E, Hynes M, Carter R. Meta-analysis of the effects of educational and psychosocial interventions on management of diabetes mellitus. <i>J Clin Epidemiol</i> 1988; 41(10): 1007-1030.                                                                                                                             |
| 54 | Pare G, Moqadem K, Pineau G, St-Hilaire C. Clinical effects of home telemonitoring in the context of diabetes, asthma, heart failure and hypertension: a systematic review. <i>J Med Internet Res</i> 2010; 12(2): e21.<br>Link: doi <a href="https://doi.org/10.2196/jmir.1357">10.2196/jmir.1357</a>                               |
| 55 | Peek ME, Cargill A, Huang ES. Diabetes health disparities: a systematic review of health care interventions. <i>Med Care Res Rev</i> 2007; 64(5 Suppl): 101S-156S.                                                                                                                                                                   |
| 56 | Post PN, Wittenberg J, Burgers JS. Do specialized centers and specialists produce better outcomes for patients with chronic diseases than primary care generalists? A systematic review. <i>Int J Qual Health Care</i> 2009; 21(6): 387-396.                                                                                         |
| 57 | Ramadas A, Quek KF, Chan CKY, Oldenburg B. Web-based interventions for the management of type 2 diabetes mellitus: A systematic review of recent evidence. <i>Int J Med Inform</i> 2011; 80(6):389-405. Link: DO - <a href="http://dx.doi.org/10.1016/j.ijmedinf.2011.02.002">http://dx.doi.org/10.1016/j.ijmedinf.2011.02.002</a> . |
| 58 | Riley SB, Marshall ES. Group visits in diabetes care: a systematic review. <i>Diabetes Educ</i> 2010; 36(6): 936-944.                                                                                                                                                                                                                |
| 59 | Ruiz-Aragon J, Portero RV, Moreno SF. Out-patient determination of glycosylated haemoglobin in the monitoring and control of diabetes mellitus: Systematic review of the literature. <i>Aten Primaria</i> 2008; 40(2): 69-74.                                                                                                        |

|    |                                                                                                                                                                                                                                                                                                                                                                                            |
|----|--------------------------------------------------------------------------------------------------------------------------------------------------------------------------------------------------------------------------------------------------------------------------------------------------------------------------------------------------------------------------------------------|
| 60 | Saudek CD, Derr RL, Kalyani RR. Assessing glycemia in diabetes using self-monitoring blood glucose and hemoglobin A1c. <i>J Am Med Assoc</i> 2006; 295(14): 1688-1697.                                                                                                                                                                                                                     |
| 61 | Seitz P, Rosemann T, Gensichen J, Huber CA. Interventions in primary care to improve cardiovascular risk factors and glycated haemoglobin (HbA1c) levels in patients with diabetes: a systematic review. <i>Diabetes Obes Metab</i> 2011; 13(6): 479-489. Link: DO - <a href="http://dx.doi.org/10.1111/j.1463-1326.2010.01347.x">http://dx.doi.org/10.1111/j.1463-1326.2010.01347.x</a> . |
| 62 | Sigurdardottir AK, Jonsdottir H, Benediktsson R. Outcomes of educational interventions in type 2 diabetes: WEKA data-mining analysis. <i>Patient Educ Couns</i> 2007; 67(1-2): 21-31.                                                                                                                                                                                                      |
| 63 | Sigurdardottir AK. Self-care in diabetes: model of factors affecting self-care. <i>J Clin Nurs</i> 2005; 14(3): 301-314.                                                                                                                                                                                                                                                                   |
| 64 | Soo H, Lam S. Stress management training in diabetes mellitus. <i>J Health Psychol</i> 2009; 14(7): 933-943.                                                                                                                                                                                                                                                                               |
| 65 | Srinivasan B, Taub N, Khunti K, Davies M. Diabetes: glycaemic control in type 2. <i>Clin Evid</i> 2008; 2008(3): 609-637.                                                                                                                                                                                                                                                                  |
| 66 | Steed L, Cooke D, Newman S. A systematic review of psychosocial outcomes following education, self-management and psychological interventions in diabetes mellitus. <i>Patient Educ Couns</i> 2003; 51(1): 5-15.                                                                                                                                                                           |
| 67 | Tolbert R. Managing type 1 diabetes at school: an integrative review. <i>J Sch Nurs</i> 2009; 25(1): 55-61.                                                                                                                                                                                                                                                                                |
| 68 | Urban AD, Berry D, Grey M. Optimizing outcomes in adolescents with type 1 diabetes and their families. <i>J Clin Outcomes Manag</i> 2004; 11(5): 299-306.                                                                                                                                                                                                                                  |
| 69 | van Bruggen JA, Gorter KJ, Stolk RP, Rutten GE. Shared and delegated systems are not quick remedies for improving diabetes care: a systematic review. <i>Prim Care Diabetes</i> 2007; 1(2): 59-68.                                                                                                                                                                                         |
| 70 | van Dam HA, van der Horst F, van den Borne B, Ryckman R, Crebolder H. Provider-patient interaction in diabetes care: effects on patient self-care and outcomes. A systematic review. <i>Patient Educ Couns</i> 2003; 51(1): 17-28.                                                                                                                                                         |
| 71 | Van Scoyoc EE, DeWalt DA. Interventions to improve diabetes outcomes for people with low literacy and numeracy: A systematic literature review. <i>Diabetes Spectr</i> 2010; 23(4): 228-237. Link: DO - <a href="http://dx.doi.org/10.2337/diaspect.23.4.228">http://dx.doi.org/10.2337/diaspect.23.4.228</a> .                                                                            |
| 72 | Verhoeven F, Tanja-Dijkstra K, Nijland N, Eysenbach G, van Gemert-Pijnen L. Asynchronous and synchronous teleconsultation for diabetes care: a systematic literature review. <i>J Diabetes Sci Technol</i> 2010; 4(3): 666-684.                                                                                                                                                            |
| 73 | Warsi A, Wang PS, LaValley MP, Avorn J, Solomon DH. Self-management education programs in chronic disease: A systematic review and methodological critique of the literature. <i>AMA Arch Intern Med</i> 2004; 164(15): 1641-1649.                                                                                                                                                         |
| 74 | Whittemore R. Culturally competent interventions for Hispanic adults with type 2 diabetes: a systematic review. <i>J Transcult Nurs</i> 2007;18(2):157-166.                                                                                                                                                                                                                                |
| 75 | Whittemore R. Strategies to facilitate lifestyle change associated with diabetes mellitus. <i>J Nurs Scholarsh</i> 2000; 32(3): 225-232.                                                                                                                                                                                                                                                   |
